# Supplementary material for: Role of Kir4.1 Channels in Aminoglycoside‐Induced Ototoxicity of Hair Cells
Source: Hindawi journal article supplement (doi:10.1155/2023/4191999), 2023-01-01
Supplement: f1 [file 4191999.f1.pdf]

**Supplementary Table 1. Primer Sequences**

| No. | Primer         | Forward                   | Reverse                  | Length(bp) |
|-----|----------------|---------------------------|--------------------------|------------|
| 1   | Kir4.1         | GGAGGAGATCCTCTGGGGTT      | CCACTGGGAGATGCCACTTT     | 117        |
| 2   | NKCC1          | TAGGTCTCTCTGTCGTCGTA      | AATAGTACGCTCCTCCTCCT     | 114        |
| 3   | KCNQ4          | CCCGGAAACCCTTCTGTGTC      | AAAGATGAGCACCAGGAACC     | 245        |
| 4   | Kcnmb1         | CTGGGAGTGGCAATGGTAGTG     | CCGAGTGTCTTCCGTGTGATAC   | 237        |
| 5   | ClnkA          | GACCCTTCAGGCGCTGTTCTG     | CGTAAACCGGGGTGAGATTTGTCC | 330        |
| 6   | ClnkB          | CTGGTGGGCGTTGTAAAAAGGAC   | GGGAGGATTGGTCAGGGTTGAA   | 285        |
| 7   | Scnn1A         | GCACCCTTAATCCTTACAGATACTG | CAAAAAGCGTCTGTTCCGTG     | 81         |
| 8   | Scnn1B         | CTCGGTGCTGTGCCTCATTG      | GCCTCAGGGAGTCATAGTTGGG   | 278        |
| 9   | Scnn1G         | TGGTCCTCCTATCCTCGTTCTG    | GTCACACCCATCAGGCAATAGC   | 344        |
| 10  | Gja1           | CGTTAAGGATCGCGTGAAG       | GTTCTGCAAGCACCCTTTTT     | 508        |
| 11  | Gjb6           | CCCAAGTTAAGCACTTCAAGG     | TTCAGCAATCGGCAATGTAT     | 611        |
| 12  | Slc26A4        | GACTGTAAAGACCCTTGTATCTGA  | GGAAGCAAGTCTACGCATGG     | 90         |
| 13  | Atp2B1         | CGGAAAATACAGGAGAGCTATGG   | CTTCCAAACTGCTTCTCTTC     | 123        |
| 14  | Atp6V1B1       | AGGACAGTGTGCAGCGTCAAT     | CCTGAACAATGGCCTTGGTC     | 151        |
| 15  | Atp6V0A4       | CAAATGTGAACAGCTTCCAGAGG   | AGCATCCTTCTCAGGCACTTGG   | 131        |
| 16  | $\beta$ -actin | TTCTACAATGAGCTGCGTGTG     | GGGGTGTGAAGGTCTCAAA      | 122        |
